## Advanced colorectal cancer: ESMO Clinical Recommendations for diagnosis, treatment and follow-up

E. J. D. Van Cutsem<sup>1</sup> & J. Oliveira<sup>2</sup>

On behalf of the ESMO Guidelines Working Group\*

<sup>1</sup>Digestive Oncology Unit, University Hospital Gasthuisberg, Leuven, Belgium; <sup>2</sup>Service of Medical Oncology, Portuguese Institute of Oncology, Lisbon, Portugal

### incidence

In 2006 there were 412 900 new cases of colorectal cancer in Europe. This is 12.9% of all cancer cases. Colorectal cancer is responsible for 217 400 deaths in Europe in 2006. This represents 12.2% of all cancer deaths.

### diagnosis

Clinical suspicion of metastatic disease should always be confirmed by adequate radiologic imaging [usually a computed tomography (CT) scan] and/or scintigraphic examination. Histopathologic or cytologic confirmation should be obtained whenever there is atypical presentation or very late presentation after the primary tumor. Resectable metastases do not need histologic or cytologic confirmation before resection. Evaluation of the general condition, concomittant pathology and organ function determines therapeutic strategy.

### staging and treatment strategy

In order to identify patients with potentially curative surgical options the staging should include clinical examination, blood counts, liver and renal function tests, carcinoembryonic antigen (CEA), chest X-ray and a CT scan of the abdomen. Baseline performance status and lactate dehydrogenase level are the strongest individual prognostic factors. CT scan of the chest and additional examinations as clinically needed are recommended before major abdominal surgery with potentially curative intent. An FDG–PET can give additional information on unequivocal lesions before resection of metastatic disease or can identify new lesions in case of planned resection of metastases.

The strategy should be discussed from a multidisciplinary perspective.

### treatment

Surgery should be considered for solitary or confined liver or pulmonary metastases. Long term survivors can be obtained in experienced hands. In patients with resectable liver metastases perioperative combination chemotherapy with 5-fluorouracil (5-FU)/leucovorin (LV)/oxaliplatin improves the outcome (improved progression-free survival). Initially unresectable liver metastases can become resectable after downsizing with chemotherapy.

First-line palliative chemotherapy should be considered early and consists of a fluoropyrimidine (i.v. 5-FU or oral fluoropyrimidines) in various combinations and schedules. Infused regimens of 5-FU/LV are generally less toxic than bolus regimens. The oral fluoropyrimidines capecitabine and uracil–ftorafur (UFT)/LV are an alternative to intravenous 5-FU/LV as monotherapy.

Combination chemotherapy with 5-FU/LV/oxaliplatin (FOLFOX regimens) or 5-FU/LV/irinotecan (FOLFIRI regimens) provides better survival than 5-FU/LV. FOLFOX and FOLFIRI have similar activity, but different toxicity profiles. The combination of capecitabine plus oxaliplatin has a similar activity to the combination 5-FU/LV/oxaliplatin. The combination of capecitabine/irinotecan might be more toxic than 5-FU/LV/irinotecan.

The duration of chemotherapy for metastatic colorectal cancer remains controversial. Treatment interruptions of combination chemotherapy may be considered, especially if cumulative toxicity occurs and if disease control is reached. Maintenance treatment with a fluoropyrimidine may be considered if an interruption of the combination chemotherapy is proposed. Reintroduction of combination chemotherapy is usually indicated in the case of progression.

Second-line chemotherapy should be proposed for patients with good performance status. In patients refractory to FOLFOX an irinotecan-based regimen can be proposed in the second-line treatment. In patients refractory to FOLFIRI, FOLFOX can be proposed in second-line treatment.

Monoclonal antibodies against vascular endothelial growth factor (VEGF) and against the epidermal growth factor receptor (EGFR) in combination with chemotherapy should be considered in selected patients with metastatic colorectal

\*Correspondence to: ESMO Guidelines Working Group, ESMO Head Office, Via L. Taddei 4, CH-6962 Viganello-Lugano, Switzerland

Approved by the ESMO Guidelines Working Group: April 2002, last update: July 2007. This publication supersedes the previously published version—Ann Oncol 2007; 18 (Suppl 2): ii25–ii26.

Conflict of interest: Dr Van Cutsem has reported no conflict of interest.

cancer. Validated molecular markers for the selection of anti-VEGF and anti-EGFR antibodies are not yet available.

Bevacizumab increases survival and progression-free survival in first-line treatment in combination with an irinotecan-based chemotherapeutic cancer regimen and progression-free survival in combination with a fluoropyrimidine plus oxaliplatin. Cetuximab and panitumumab are active as single agents in chemorefractory metastatic colorectal cancer. The combination of cetuximab with irinotecan is more active than cetuximab monotherapy.

The antibodies against VEGF and EGFR have a specific spectrum of adverse events.

## response evaluation

History, physical examination, CEA if initially elevated and a CT scan of the involved region are recommended after 2–3 months of palliative chemotherapy.

## note

Levels of evidence [I–V] and grades of recommendation [A–D] as used by the American Society of Clinical Oncology are given in square brackets. Statements without grading were considered justified standard clinical practice by the experts and the ESMO faculty.

## literature

- Douillard JY, Cunningham D, Roth AD et al. Irinotecan combined with fluorouracil compared with fluorouracil alone as first-line treatment for metastatic colorectal cancer: a multicentre randomised trial. *Lancet* 2000; 355: 1041–1047.
- de Gramont A, Figuer A, Seymour M et al. Leucovorin and fluorouracil with or without oxaliplatin as first-line treatment in advanced colorectal cancer. *J Clin Oncol* 2000; 18: 2938–2947.
- Goldberg RM, Sargent DJ et al. A randomized controlled trial of fluorouracil plus leucovorin, irinotecan, and oxaliplatin combinations in patients with previously untreated metastatic colorectal cancer. *J Clin Oncol* 2004; 22: 23–30.
- Tournigand C, Andre T, Achille E et al. FOLFIRI followed by FOLFOX6 or the reverse sequence in advanced colorectal cancer: a randomized GERCOR study. *J Clin Oncol* 2004; 22: 229–237.
- Van Cutsem E, Hoff PM, Harper P et al. Oral capecitabine vs intravenous 5-fluorouracil and leucovorin: integrated efficacy data and novel analyses from two large, randomised phase III trials. *Brit J Cancer* 2004; 90: 1190–1197.
- Cunningham D, Pyrhonen S, James RD et al. Randomised trial of irinotecan plus supportive care versus supportive care alone after fluorouracil failure for patients with metastatic colorectal cancer. *Lancet* 1998; 352: 1413–1418.
- Rougier P, Van Cutsem E, Bajetta E et al. Randomised trial of irinotecan versus fluorouracil by continuous infusion after fluorouracil failure in patients with metastatic colorectal cancer. *Lancet* 1998; 352: 1407–1412.
- Van Cutsem E, Nordlinger B, Adam R et al. Towards a pan-European consensus on the treatment of patients with colorectal liver metastases. *Eur J Cancer* 2006; 42: 2212–2221.
- Hurwitz H, Fehrenbacher L, Novotny W et al. Bevacizumab plus irinotecan, fluorouracil, and leucovorin for metastatic colorectal cancer. *N Engl J Med* 2004; 350: 2335–2342.
- Cunningham D, Humblet Y, Siena S et al. Cetuximab monotherapy and cetuximab plus irinotecan in irinotecan refractory metastatic colorectal cancer. *N Engl J Med* 2004; 351: 337–345.
- Tournigand C, Cervantes A, Figuer A et al. FOLFOX4 or FOLFOX7 with oxaliplatin stop-and-go in advanced colorectal cancer. Optimox1, a randomised GERCOR study. *J Clin Oncol* 2006; 24: 394–400.
